# Supplementary material for: Healthcare worker experiences with Option B+ for prevention of mother-to-child HIV transmission in eSwatini: findings from a two-year follow-up study
Source: PubMed Central journal article supplement (PMC6444445; doi:10.1186/s12913-019-3997-1), 2019-04-02
Supplement: 12913_2019_3997_MOESM2_ESM.pdf [file 12913_2019_3997_MOESM2_ESM.pdf]

# SITUKULWANE LESIPHEPHILE - SAFE GENERATIONS

## PMTCT Health Care Worker Acceptability Assessment

COMPLETE ALL THE INFORMATION ON THIS PAGE BEFORE STARTING THE INTERVIEW.

|                                           |                                                                                                                                                                                                                                                                                                                                                                                                       |                      |                      |                      |                      |                      |                      |     |       |      |  |  |  |
|-------------------------------------------|-------------------------------------------------------------------------------------------------------------------------------------------------------------------------------------------------------------------------------------------------------------------------------------------------------------------------------------------------------------------------------------------------------|----------------------|----------------------|----------------------|----------------------|----------------------|----------------------|-----|-------|------|--|--|--|
| Interviewer code                          | <input type="text"/> <input type="text"/> <input type="text"/>                                                                                                                                                                                                                                                                                                                                        |                      |                      |                      |                      |                      |                      |     |       |      |  |  |  |
| HCW participant identification number     | <input type="text"/> <input type="text"/> - <input type="text"/> <input type="text"/> <input type="text"/> <input type="text"/>                                                                                                                                                                                                                                                                       |                      |                      |                      |                      |                      |                      |     |       |      |  |  |  |
| Date of interview (Study enrollment date) | <table border="0"> <tr> <td><input type="text"/></td> <td><input type="text"/></td> <td><input type="text"/></td> <td><input type="text"/></td> <td><input type="text"/></td> <td><input type="text"/></td> </tr> <tr> <td>DAY</td> <td>MONTH</td> <td colspan="2">YEAR</td> <td></td> <td></td> </tr> </table>                                                                                       | <input type="text"/> | <input type="text"/> | <input type="text"/> | <input type="text"/> | <input type="text"/> | <input type="text"/> | DAY | MONTH | YEAR |  |  |  |
| <input type="text"/>                      | <input type="text"/>                                                                                                                                                                                                                                                                                                                                                                                  | <input type="text"/> | <input type="text"/> | <input type="text"/> | <input type="text"/> |                      |                      |     |       |      |  |  |  |
| DAY                                       | MONTH                                                                                                                                                                                                                                                                                                                                                                                                 | YEAR                 |                      |                      |                      |                      |                      |     |       |      |  |  |  |
| Timing of Follow-up Interview             | _____ months post implementation of B+                                                                                                                                                                                                                                                                                                                                                                |                      |                      |                      |                      |                      |                      |     |       |      |  |  |  |
| Study Site                                | <input type="checkbox"/> KSII PHU<br><input type="checkbox"/> RFM Hospital<br><input type="checkbox"/> FLAS Manzini<br><input type="checkbox"/> Siteki PHU<br><input type="checkbox"/> MSF Matsapha<br><input type="checkbox"/> Mbikwakhe<br><input type="checkbox"/> Siphofaneni<br><input type="checkbox"/> Lamvelase<br><input type="checkbox"/> Luyengo<br><input type="checkbox"/> Mankayane PHU |                      |                      |                      |                      |                      |                      |     |       |      |  |  |  |

HCW FOLLOW-UP QUESTIONNAIRE

**Introduction:**

Recently, the Ministry of Health of the Kingdom Swaziland has implemented a PMTCT approach where all HIV-positive pregnant women start ART and stay on treatment for life whether they have a low or high CD4 count (Option B+). Several months ago, as part of a research study, all women coming for PMTCT services at this clinic started receiving Option B+ instead of Option A.

We want to evaluate how this new PMTCT approach, Option B+, is working. As part of the evaluation, we are going to be asking health care workers, like you, about their experience providing PMTCT services at this clinic.

**Section I. DEMOGRAPHICS**

**Basic Information**

|                                                               |                                                                                                                                                                                                                                                                                                                                                                                                                                                                                                                                                                                                                             |                                                        |                                                 |                                                               |                                               |                                                |                                           |                                                    |  |                                       |  |
|---------------------------------------------------------------|-----------------------------------------------------------------------------------------------------------------------------------------------------------------------------------------------------------------------------------------------------------------------------------------------------------------------------------------------------------------------------------------------------------------------------------------------------------------------------------------------------------------------------------------------------------------------------------------------------------------------------|--------------------------------------------------------|-------------------------------------------------|---------------------------------------------------------------|-----------------------------------------------|------------------------------------------------|-------------------------------------------|----------------------------------------------------|--|---------------------------------------|--|
| 1. How old are you?                                           | Age: _____(years)                                                                                                                                                                                                                                                                                                                                                                                                                                                                                                                                                                                                           |                                                        |                                                 |                                                               |                                               |                                                |                                           |                                                    |  |                                       |  |
| 2. Gender?                                                    | <input type="checkbox"/> Female<br><input type="checkbox"/> Male                                                                                                                                                                                                                                                                                                                                                                                                                                                                                                                                                            |                                                        |                                                 |                                                               |                                               |                                                |                                           |                                                    |  |                                       |  |
| 3. What is your area of residence?                            | <i>Area of residence:</i><br>_____                                                                                                                                                                                                                                                                                                                                                                                                                                                                                                                                                                                          |                                                        |                                                 |                                                               |                                               |                                                |                                           |                                                    |  |                                       |  |
| 4. What is your current job?                                  | <input type="checkbox"/> Nurse<br><input type="checkbox"/> Nurse Midwife<br><input type="checkbox"/> Expert Client<br><input type="checkbox"/> Peer Counselor<br><input type="checkbox"/> Other _____                                                                                                                                                                                                                                                                                                                                                                                                                       |                                                        |                                                 |                                                               |                                               |                                                |                                           |                                                    |  |                                       |  |
| 5. Where do you work?<br>(check all that apply)               | <i>Specify:</i> <table style="width: 100%; border: none;"> <tr> <td><input type="checkbox"/> Antenatal Care services (ANC)</td> <td><input type="checkbox"/> Child welfare services</td> </tr> <tr> <td><input type="checkbox"/> Maternal Child Health services (MCH)</td> <td><input type="checkbox"/> Pediatric ART Clinic</td> </tr> <tr> <td><input type="checkbox"/> Hospital Ward (Adult)</td> <td><input type="checkbox"/> Adult ART Clinic</td> </tr> <tr> <td><input type="checkbox"/> Hospital Ward (Pediatric)</td> <td></td> </tr> <tr> <td><input type="checkbox"/> Other: _____</td> <td></td> </tr> </table> | <input type="checkbox"/> Antenatal Care services (ANC) | <input type="checkbox"/> Child welfare services | <input type="checkbox"/> Maternal Child Health services (MCH) | <input type="checkbox"/> Pediatric ART Clinic | <input type="checkbox"/> Hospital Ward (Adult) | <input type="checkbox"/> Adult ART Clinic | <input type="checkbox"/> Hospital Ward (Pediatric) |  | <input type="checkbox"/> Other: _____ |  |
| <input type="checkbox"/> Antenatal Care services (ANC)        | <input type="checkbox"/> Child welfare services                                                                                                                                                                                                                                                                                                                                                                                                                                                                                                                                                                             |                                                        |                                                 |                                                               |                                               |                                                |                                           |                                                    |  |                                       |  |
| <input type="checkbox"/> Maternal Child Health services (MCH) | <input type="checkbox"/> Pediatric ART Clinic                                                                                                                                                                                                                                                                                                                                                                                                                                                                                                                                                                               |                                                        |                                                 |                                                               |                                               |                                                |                                           |                                                    |  |                                       |  |
| <input type="checkbox"/> Hospital Ward (Adult)                | <input type="checkbox"/> Adult ART Clinic                                                                                                                                                                                                                                                                                                                                                                                                                                                                                                                                                                                   |                                                        |                                                 |                                                               |                                               |                                                |                                           |                                                    |  |                                       |  |
| <input type="checkbox"/> Hospital Ward (Pediatric)            |                                                                                                                                                                                                                                                                                                                                                                                                                                                                                                                                                                                                                             |                                                        |                                                 |                                                               |                                               |                                                |                                           |                                                    |  |                                       |  |
| <input type="checkbox"/> Other: _____                         |                                                                                                                                                                                                                                                                                                                                                                                                                                                                                                                                                                                                                             |                                                        |                                                 |                                                               |                                               |                                                |                                           |                                                    |  |                                       |  |

HCW FOLLOW-UP QUESTIONNAIRE

6. In your role as [**INSERT RESPONSE from Question 4**], what types of activities are you involved with?

*(check all that apply)*

- HIV testing and giving HIV results
- CD4 testing and giving CD4 results
- Counseling on PMTCT
- Counseling on infant feeding
- Counseling on antenatal care
- Counseling on adherence
- Prescribing HIV medications
- Monitoring side effects from medications
- PCR testing
- Counseling on family planning
- Scheduling appointments
- Following-up missed appointments
- Other, specify: \_\_\_\_\_

HCW FOLLOW-UP QUESTIONNAIRE

| <b>Section II. UNDERSTANDING OF OPTION B+</b>                                                                                                                                                           |                                        |       |        |            |
|---------------------------------------------------------------------------------------------------------------------------------------------------------------------------------------------------------|----------------------------------------|-------|--------|------------|
| 7. When was Option B+ implemented at this clinic?                                                                                                                                                       |                                        |       |        |            |
| 8. Were you a part of the transition from Option A to Option B+?                                                                                                                                        |                                        |       |        |            |
| 9. How long have you been involved in the implementation of Option B+ at this clinic?                                                                                                                   | <i>Length of time:</i><br>_____ months |       |        |            |
| 10. I am going to read a list and would like you to tell me which items on the list are part of Option B+ for PMTCT. Please say TRUE if part of Option B+ and FALSE if not part of Option B+ for PMTCT. |                                        |       |        |            |
| Sending a CD4 count test                                                                                                                                                                                | True                                   | False | Refuse | Don't Know |
| Making an appointment for women in the ART clinic                                                                                                                                                       | True                                   | False | Refuse | Don't Know |
| Giving ART to women with CD4<350                                                                                                                                                                        | True                                   | False | Refuse | Don't Know |
| Giving AZT to women with CD4>350                                                                                                                                                                        | True                                   | False | Refuse | Don't Know |
| Starting AZT/ART 14 weeks gestation                                                                                                                                                                     | True                                   | False | Refuse | Don't Know |
| Giving ART to all women                                                                                                                                                                                 | True                                   | False | Refuse | Don't Know |
| Starting ART as soon as diagnosed as HIV infected                                                                                                                                                       | True                                   | False | Refuse | Don't Know |
| Starting ART for life for all HIV positive pregnant women                                                                                                                                               | True                                   | False | Refuse | Don't Know |
| Giving NVP to women to take at delivery                                                                                                                                                                 | True                                   | False | Refuse | Don't Know |
| Giving NVP to babies after birth                                                                                                                                                                        | True                                   | False | Refuse | Don't Know |
| Testing infants with DNA PCR DBS                                                                                                                                                                        | True                                   | False | Refuse | Don't Know |
| Counseling mothers on breast feeding                                                                                                                                                                    | True                                   | False | Refuse | Don't Know |
| Testing partners                                                                                                                                                                                        | True                                   | False | Refuse | Don't Know |
| Testing other family members                                                                                                                                                                            | True                                   | False | Refuse | Don't Know |
| Checking CD4 counts after delivery                                                                                                                                                                      | True                                   | False | Refuse | Don't Know |

HCW FOLLOW-UP QUESTIONNAIRE

|                                                                                                                                                                     |                                                                                                                                                                                     |
|---------------------------------------------------------------------------------------------------------------------------------------------------------------------|-------------------------------------------------------------------------------------------------------------------------------------------------------------------------------------|
| <p>11. In your opinion what are the things about Option B+ that are <b>easy</b> for you and your co-workers?</p>                                                    | <hr/> <hr/> <hr/> <hr/> <hr/> <hr/>                                                                                                                                                 |
| <p>12. In your opinion what are the things about Option B+ that are <b>difficult</b> for you and your co-workers?</p>                                               | <hr/> <hr/> <hr/> <hr/> <hr/> <hr/>                                                                                                                                                 |
| <p>13. Do you think <u>following up with patients</u> who initiated ART under Option B+ is easy or hard for <u>healthcare workers</u>?<br/><br/>Please explain.</p> | <p><input type="checkbox"/> Easy (<i>explain</i>)</p> <hr/> <hr/> <hr/> <hr/> <hr/> <hr/> <p><input type="checkbox"/> Hard (<i>explain</i>)</p> <hr/> <hr/> <hr/> <hr/> <hr/> <hr/> |
| <p>14. Do you think <u>documentation of patient care</u> under Option B+ is easy or hard for <u>healthcare workers</u>? Please explain.</p>                         | <p>Easy (<i>explain</i>)</p> <hr/>                                                                                                                                                  |

HCW FOLLOW-UP QUESTIONNAIRE

|                                                                                                                  |                                                                                                                                                                                                                                                                                                                                                                         |
|------------------------------------------------------------------------------------------------------------------|-------------------------------------------------------------------------------------------------------------------------------------------------------------------------------------------------------------------------------------------------------------------------------------------------------------------------------------------------------------------------|
|                                                                                                                  | <hr/>                                                                                                                                                                                                                                                                                                             |
| <p>15. Overall, do you think Option B+ is easy or hard for <u>healthcare workers</u>?</p> <p>Please explain.</p> | <p><input type="checkbox"/> Hard (<i>explain</i>)</p> <hr/> <p><input type="checkbox"/> Easy (<i>explain</i>)</p> <hr/> <p><input type="checkbox"/> Hard (<i>explain</i>)</p> <hr/> |
| <p>16. Do you think you have more work or less work now (since implementation of Option B+)?</p>                 | <p><input type="checkbox"/> More work</p> <p><input type="checkbox"/> Less work</p> <p><input type="checkbox"/> Same amount</p>                                                                                                                                                                                                                                         |
| <p>17. Please explain</p>                                                                                        |                                                                                                                                                                                                                                                                                                                                                                         |

HCW FOLLOW-UP QUESTIONNAIRE

|                                                                                                         |                                                                                                                                                                 |
|---------------------------------------------------------------------------------------------------------|-----------------------------------------------------------------------------------------------------------------------------------------------------------------|
|                                                                                                         | <hr/> <hr/> <hr/> <hr/> <hr/> <hr/>                                                                                                                             |
| <b>COUNSELING</b>                                                                                       |                                                                                                                                                                 |
| 18. What do you discuss when you counsel HIV-positive women about ART for life?                         | <hr/> <hr/> <hr/> <hr/> <hr/> <hr/>                                                                                                                             |
| 19. In your opinion is it easy or difficult to counsel patients about Option B+?<br><br>Please explain. | <input type="checkbox"/> Easy ( <i>explain</i> )<br><hr/> <hr/> <hr/> <hr/><br><input type="checkbox"/> Difficult ( <i>explain</i> )<br><hr/> <hr/> <hr/> <hr/> |
| <b>PATIENTS</b>                                                                                         |                                                                                                                                                                 |

HCW FOLLOW-UP QUESTIONNAIRE

|                                                                                                                                                                                                                                                               |                                                                                                                                                              |
|---------------------------------------------------------------------------------------------------------------------------------------------------------------------------------------------------------------------------------------------------------------|--------------------------------------------------------------------------------------------------------------------------------------------------------------|
| <p>20. Do you find that women commonly refuse to start ART the same day they are diagnosed with HIV?</p> <p>Please explain.</p>                                                                                                                               | <p><input type="checkbox"/> No (<i>explain</i>)</p> <hr/> <hr/> <hr/> <hr/> <p><input type="checkbox"/> Yes (<i>specify why</i>)</p> <hr/> <hr/> <hr/> <hr/> |
| <p>21. In your opinion what are the things about Option B+ that are <b>easy</b> for patients?</p> <p>Please explain.</p>                                                                                                                                      | <hr/> <hr/> <hr/> <hr/>                                                                                                                                      |
| <p>22. In your opinion what are the things about Option B+ that are <b>difficult</b> for patients?</p> <p>Please explain.</p>                                                                                                                                 | <hr/> <hr/> <hr/> <hr/>                                                                                                                                      |
| <p>23. We know that sometimes HIV-positive women do not complete all of the PMTCT steps during pregnancy and after the baby is born. What do you think are some of the common barriers HIV-positive women face in completing these steps under Option B+?</p> | <hr/> <hr/> <hr/> <hr/> <hr/> <hr/>                                                                                                                          |
| <p>24. How frequently do women drop out of care <u>before</u> giving</p>                                                                                                                                                                                      | <p><input type="checkbox"/> Never</p>                                                                                                                        |



HCW FOLLOW-UP QUESTIONNAIRE

|                                                                                                                                  |                                                                                                                                                                                                                                          |
|----------------------------------------------------------------------------------------------------------------------------------|------------------------------------------------------------------------------------------------------------------------------------------------------------------------------------------------------------------------------------------|
| <p>birth at your facility?</p>                                                                                                   | <p><input type="checkbox"/> Less than half the time<br/> <input type="checkbox"/> About half the time<br/> <input type="checkbox"/> More than half the time<br/> <input type="checkbox"/> Always</p>                                     |
| <p>25. Why do you think this happens?</p>                                                                                        | <p>_____</p> <p>_____</p> <p>_____</p> <p>_____</p> <p>_____</p>                                                                                                                                                                         |
| <p>26. How frequently do women drop out of care <u>after</u> giving birth?</p>                                                   | <p><input type="checkbox"/> Never<br/> <input type="checkbox"/> Less than half the time<br/> <input type="checkbox"/> About half the time<br/> <input type="checkbox"/> More than half the time<br/> <input type="checkbox"/> Always</p> |
| <p>27. Why do you think this happens?</p>                                                                                        | <p>_____</p> <p>_____</p> <p>_____</p> <p>_____</p>                                                                                                                                                                                      |
| <p>28. How frequently do women attend HIV care visits without their infants (i.e., maternal-infant visits not synchronized)?</p> | <p><input type="checkbox"/> Never<br/> <input type="checkbox"/> Less than half the time<br/> <input type="checkbox"/> About half the time<br/> <input type="checkbox"/> More than half the time<br/> <input type="checkbox"/> Always</p> |
| <p>29. Why do you think this happens?</p>                                                                                        | <p>_____</p> <p>_____</p> <p>_____</p>                                                                                                                                                                                                   |

HCW FOLLOW-UP QUESTIONNAIRE

|                                                                                                           |                                                                                                                                                                                                                                                                                                                                                                    |
|-----------------------------------------------------------------------------------------------------------|--------------------------------------------------------------------------------------------------------------------------------------------------------------------------------------------------------------------------------------------------------------------------------------------------------------------------------------------------------------------|
|                                                                                                           |                                                                                                                                                                                                                                                                                                                                                                    |
| <p>30. How frequently are babies brought back for care by someone other than their mother?</p>            | <p><input type="checkbox"/> Never<br/> <input type="checkbox"/> Less than half the time<br/> <input type="checkbox"/> About half the time<br/> <input type="checkbox"/> More than half the time<br/> <input type="checkbox"/> Always</p>                                                                                                                           |
| <p>31. Why do you think this happens?</p>                                                                 | <p>_____<br/>         _____<br/>         _____<br/>         _____</p>                                                                                                                                                                                                                                                                                              |
| <p>32. Overall, do you think Option B+ makes things easy or hard for <u>patients</u>? Please explain.</p> | <p><input type="checkbox"/> Easy (<i>explain</i>)<br/>         _____<br/>         _____<br/>         _____<br/>         _____<br/>         _____<br/>         _____<br/>         _____<br/>         _____</p> <p><input type="checkbox"/> Hard (<i>explain</i>)<br/>         _____<br/>         _____<br/>         _____<br/>         _____<br/>         _____</p> |

| <b>Section IV. BARRIERS TO UPTAKE OF PMTCT</b>                                                                                                                                                                    |                                                                                                                                                                                                                                                                                                                                                                                                                                                                                                                                                                                                                                                                                                                                                                                                                                                                                                                                                                                             |
|-------------------------------------------------------------------------------------------------------------------------------------------------------------------------------------------------------------------|---------------------------------------------------------------------------------------------------------------------------------------------------------------------------------------------------------------------------------------------------------------------------------------------------------------------------------------------------------------------------------------------------------------------------------------------------------------------------------------------------------------------------------------------------------------------------------------------------------------------------------------------------------------------------------------------------------------------------------------------------------------------------------------------------------------------------------------------------------------------------------------------------------------------------------------------------------------------------------------------|
| <p><i>Sometimes women stop coming back to the clinic for PMTCT services. We want to learn more about why this happens. Could any of these be a reason why a woman would not come back for PMTCT services?</i></p> |                                                                                                                                                                                                                                                                                                                                                                                                                                                                                                                                                                                                                                                                                                                                                                                                                                                                                                                                                                                             |
| <p>33. Problems with the health services</p> <p style="text-align: center;"><i>(read responses and check all that apply)</i></p>                                                                                  | <ul style="list-style-type: none"> <li><input type="checkbox"/> Clinic runs out of supplies and medications that women need</li> <li><input type="checkbox"/> Too many other people at the clinic</li> <li><input type="checkbox"/> Facility is too far</li> <li><input type="checkbox"/> Appointment system does not work</li> <li><input type="checkbox"/> Waiting time is too long</li> <li><input type="checkbox"/> Attitudes of health care workers</li> <li><input type="checkbox"/> No evening or weekend hours</li> <li><input type="checkbox"/> No coordination between services (services not integrated so woman has to visit too many service areas/clinics to receive care)</li> <li><input type="checkbox"/> Other, specify: _____</li> </ul>                                                                                                                                                                                                                                 |
| <p>34. Problems with the clinic staff</p> <p style="text-align: center;"><i>(read responses and check all that apply)</i></p>                                                                                     | <ul style="list-style-type: none"> <li><input type="checkbox"/> Clinic staff don't spend enough time with patient</li> <li><input type="checkbox"/> Clinic staff don't seem well trained</li> <li><input type="checkbox"/> Clinic staff have too many other things to do</li> <li><input type="checkbox"/> Clinic staff don't provide sufficient counseling support</li> <li><input type="checkbox"/> Other, specify _____</li> </ul>                                                                                                                                                                                                                                                                                                                                                                                                                                                                                                                                                       |
| <p>35. Personal issues for women</p> <p style="text-align: center;"><i>(read responses and check all that apply)</i></p>                                                                                          | <ul style="list-style-type: none"> <li><input type="checkbox"/> Concerned about confidentiality</li> <li><input type="checkbox"/> Concerned about others learning their HIV status</li> <li><input type="checkbox"/> Want to consult with partner or family</li> <li><input type="checkbox"/> Don't want to take HIV medicines for life</li> <li><input type="checkbox"/> Don't want to start taking HIV medicines during pregnancy</li> <li><input type="checkbox"/> Don't want to start taking HIV medicines when they are feeling healthy</li> <li><input type="checkbox"/> Don't want to take HIV medicines during breastfeeding</li> <li><input type="checkbox"/> Don't believe they have HIV infection</li> <li><input type="checkbox"/> Afraid of side effects from taking HIV medicines</li> <li><input type="checkbox"/> Pressure from family members including husband/partner (<i>specify pressure</i>) _____</li> <li><input type="checkbox"/> Other, specify: _____</li> </ul> |

HCW FOLLOW-UP QUESTIONNAIRE

| <b>Section III. ATTITUDES ABOUT PMTCT AND PERCEPTIONS OF CLIENT UPTAKE</b>                                                                                                                                 |                            |          |         |            |         |
|------------------------------------------------------------------------------------------------------------------------------------------------------------------------------------------------------------|----------------------------|----------|---------|------------|---------|
| <i>I will read a few statements regarding attitudes and perceptions of PMTCT Clients. Please respond with Agree with statement, Disagree with statement or Neutral</i>                                     |                            |          |         |            |         |
| <i>Read Statements</i>                                                                                                                                                                                     | <i>Circle one response</i> |          |         |            |         |
| 36. It is very difficult for an HIV-positive woman to decide to start taking HIV medicines for life while she is pregnant.                                                                                 | Agree                      | Disagree | Neutral | Don't Know | Refused |
| 37. It is very difficult for an HIV-positive pregnant woman to decide to start taking HIV medicines for life if she is feeling healthy.                                                                    | Agree                      | Disagree | Neutral | Don't Know | Refused |
| 38. It is very difficult for an HIV-positive pregnant woman with a high CD4 count to decide to start taking HIV medicines for life.                                                                        | Agree                      | Disagree | Neutral | Don't Know | Refused |
| 39. HIV-positive pregnant women should start HIV medicine (ART) and remain on it for life rather than giving ART to only those who have a low CD4 count and giving ARV prophylaxis to those with high CD4. | Agree                      | Disagree | Neutral | Don't Know | Refused |
| 40. It will be difficult to explain why a healthy HIV-positive pregnant woman should start HIV medicines when other adults don't start until their CD4 count is low.                                       | Agree                      | Disagree | Neutral | Don't Know | Refused |
| 41. It is easier to counsel patients under option A compared to option B+.                                                                                                                                 | Agree                      | Disagree | Neutral | Don't Know | Refused |

**Section VI. ADDITIONAL INFORMATION**

42. Is there anything else that you would like to share about your experience with PMTCT services? Are there ways that Option B+ services could be improved?

---

---

---

---

---

---

---

---

---

---

---

---

---

---

---

---

---

---

---

---

---

---

---

---

---
